# Supplementary material
Source: PubMed Central journal article supplement (PMC153634)

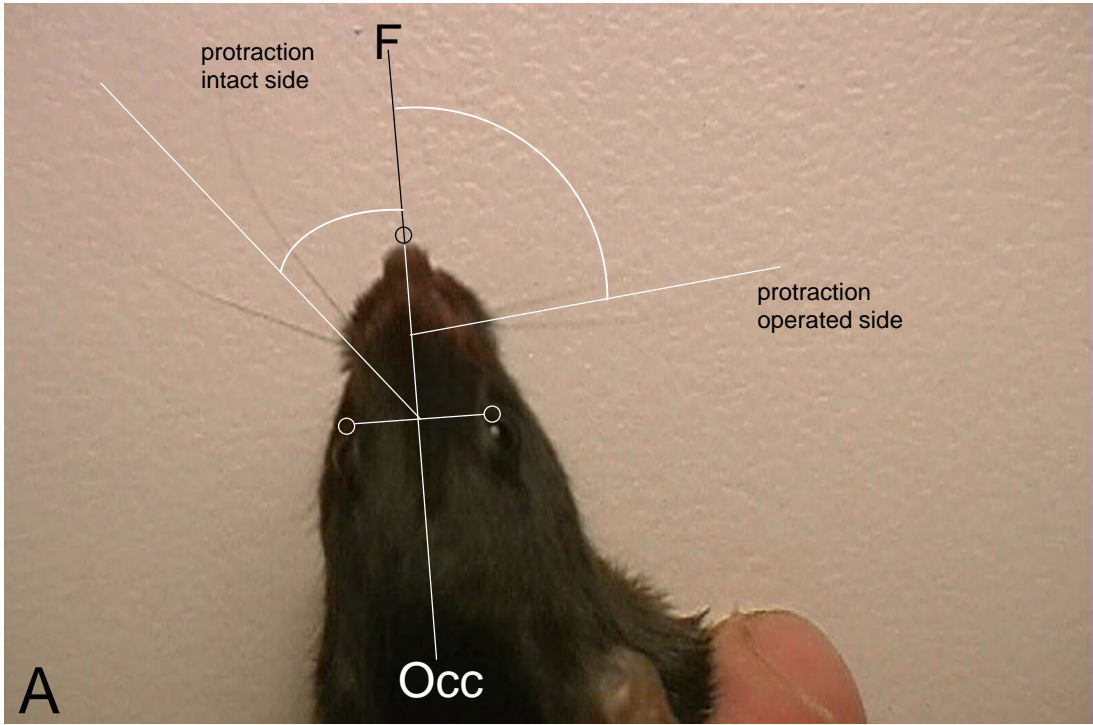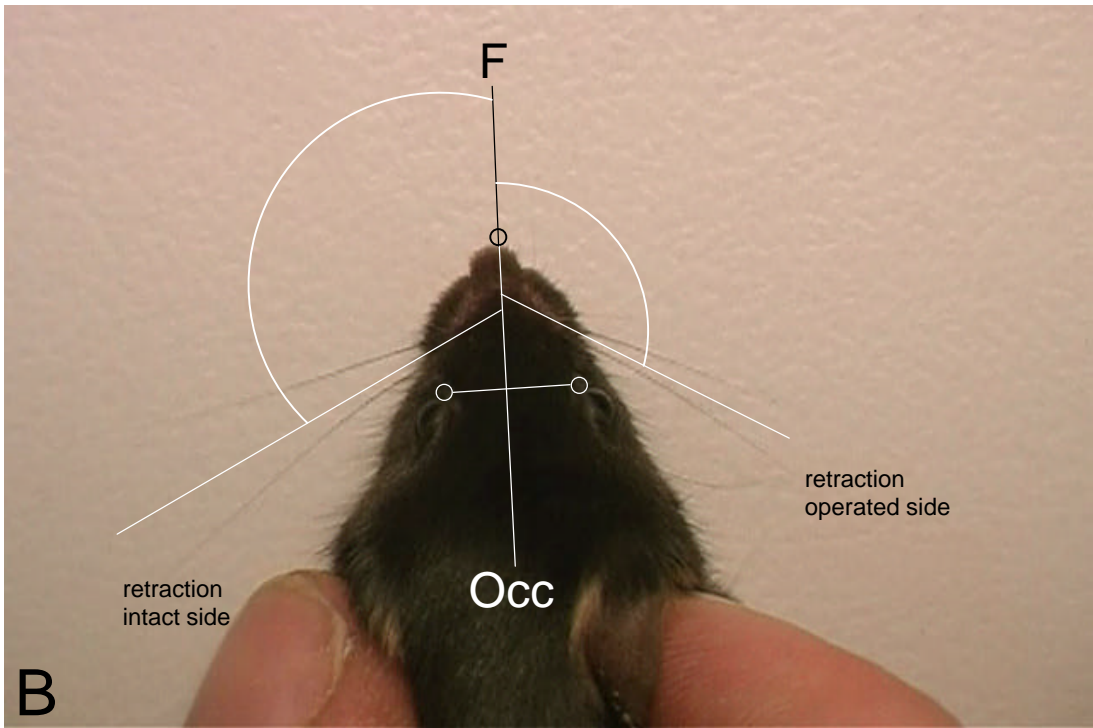

Supplement: pnas_0530191100_2.pdf [file pnas_0530191100_2.pdf]
